**Title:** Intranasal inoculation of *Cryptococcus neoformans* in mice produces nasal infection with rapid brain dissemination

**Carolina Coelho<sup>1,2#</sup>, Emma Camacho<sup>1</sup>, Antonio Salas<sup>3</sup>, Alexandre Alanio<sup>4</sup>, Arturo Casadevall<sup>1,#</sup>**

<sup>1</sup>W. Harry Feinstone Department of Molecular Microbiology and Immunology, Johns Hopkins University Bloomberg School of Public Health, Baltimore MD, USA

<sup>2</sup>Medical Research Council Centre for Medical Mycology, Institute of Medical Sciences, University of Aberdeen, Aberdeen, UK, and Department of Biosciences, College of Life and Environmental Sciences, University of Exeter, Exeter, UK

<sup>3</sup>Johns Hopkins School of Medicine, Baltimore MD, USA

<sup>4</sup> Institut Pasteur, Molecular Mycology Unit, CNRS UMR2000; Université Paris Diderot, Sorbonne Paris Cité ; Laboratoire de Parasitologie-Mycologie, Hôpital Saint-Louis, Groupe Hospitalier Lariboisière, Saint-Louis, Fernand Widal, Assistance Publique-Hôpitaux de Paris (AP-HP), Paris, France.

21  
22  
23  
24  
25  
26  
27  
28  
29  
30  
31  
32  
33  
34

Running title: Rapid brain dissemination by *C. neoformans*

To whom correspondence should be addressed:

#Arturo Casadevall MD, PhD, Bloomberg Distinguished Professor, Alfred and Jill Summer Professor and Chair of Molecular Microbiology and Immunology, Professor of Medicine, Johns Hopkins Bloomberg School of Public Health, 615 North Wolfe Street, Baltimore, MD 21205, [arturo.casadevall@jhu.edu](mailto:arturo.casadevall@jhu.edu)

#Carolina Coelho, Medical Research Council Centre for Medical Mycology, Department of Biosciences, College of Life and Environmental Sciences, University of Exeter, Stocker Road, Exeter, UK EX4 4QD, and Institute of Medical Sciences, University of Aberdeen, Ashgrove Road West, Aberdeen, UK AB25 2ZD, [c.coelho@exeter.ac.uk](mailto:c.coelho@exeter.ac.uk)

## Abstract:

*Cryptococcus neoformans* is an important fungal pathogen, causing life-threatening pneumonia and meningoencephalitis. Brain dissemination of *C. neoformans* is thought to be a consequence of an active infection in the lung which then extravasates to other sites. Brain invasion results from dissemination via the bloodstream, either by free yeast cells in bloodstream or Trojan horse transport within mononuclear phagocytes. We assessed brain dissemination in three mouse models of infection: intravenous, intratracheal, and intranasal. All three modes of infection resulted in dissemination of *C. neoformans* to the brain in under 3 hours. Further, *C. neoformans* was detected in the entirety of the upper respiratory tract and the ear canals of mice. In recent years, intranasal infection has become a popular mechanism to induce pulmonary infection because it avoids surgery but our findings show that instillation of *C. neoformans* produces cryptococcal nasal infection. These findings imply that immunological studies using intranasal infection should assume the initial sites of infection are brain, lung and upper respiratory tract, including the nasal airways.

## Importance

*Cryptococcus neoformans* causes an estimated 181, 000 deaths each year, mostly associated with untreated HIV/AIDS. *C. neoformans* has a ubiquitous worldwide distribution. Humans become infected from exposure to environmental sources and the

fungus lays dormant within the human body. Upon immunosuppression, such as AIDS or therapy-induced as required by organ transplant recipients or autoimmune disease patients, cryptococcal disease reactivates and causes life-threatening meningitis and pneumonia. This study has detected that upon contact with the host, *C. neoformans* can quickly (a few hours) reach the host brain and will also colonize the nose of infected animals. Therefore, this work paves the way to better knowledge of how *C. neoformans* travels through the host body. Understanding how *C. neoformans* infects, disseminates and survives within the host is critically required so that we can prevent infections and the disease caused by this deadly fungus.

## 66 Introduction:

67 The genus *Cryptococcus* is populated by environmental fungi, wood-rotting fungi  
 68 most commonly associated with trees but also with bird guano. Two species of  
 69 *Cryptococcus* can cause life-threatening disease in humans, characterized mainly by  
 70 pneumonia and life-threatening meningoencephalitis. *C. neoformans* var. *grubii* is the  
 71 most prevalent pathogen of the genus *Cryptococcus*, causing approximately 200,000  
 72 deaths each year, mostly associated with HIV-positive individuals, while the closely  
 73 related species *C. gattii* was responsible for an outbreak in British Columbia in  
 74 apparently immunocompetent individuals (1-3).

75 The current paradigm for the pathogenesis of human cryptococcosis emerged  
 76 from a series of observations made over several decades. Exposure is due to inhalation  
 77 of infectious propagules from the environmental niches. Colonization of the lungs by  
 78 spores, desiccated yeasts or yeast cells is thought to be quickly controlled by the  
 79 human immune system via granuloma formation (called cryptococcoma). In the 1950s,  
 80 silent cryptococcal granulomas were reported in lungs, establishing a parallel to latent  
 81 tuberculosis (4). In support of this notion, serological studies have established that  
 82 adults have antibodies to *C. neoformans* (5) or had delayed hypersensitivity skin  
 83 reactions (6), consistent with asymptomatic infection. Both teenagers or children under  
 84 the age of 5 living in urban areas are immunoreactive against *Cryptococcus* (7, 8).  
 85 Finally HIV-patients are infected with a serotype most commonly isolated from their  
 86 place of birth or where they spent their infancy (9). Hence, humans are exposed very  
 87 early in life to this yeast without developing noticeable disease. Silent or latent infections

due to containment in the lungs is further supported by the observation that some recipients of lung transplants develop a cryptococcal infection originated from the donor lung (10-12). Even though most infections of *C. neoformans* in humans are asymptomatic, a significant and unknown proportion of humans become latent carriers of *C. neoformans* which may reactivate as host immunity declines.

Given that initial human infection is thought to start from the lungs, research in pathogenesis of *C. neoformans* commonly uses pulmonary infection models. The two inoculation routes most commonly used are intratracheal and intranasal infection. Intratracheal infection delivers *C. neoformans* directly to the respiratory tree but requires surgery and significant skill. In contrast, intranasal infection is done by depositing a solution containing *C. neoformans* in the nose of an anesthetized mice, which then inhales it as these animals are obligate nose breathers. Since intranasal infection does not require surgery, it has become a popular mode of inducing *C. neoformans* infection in mice. Intranasal infection has been accepted as a procedure for inducing pulmonary infection without much investigation as to what actually happens after nose deposition of an infective inoculum. In some cases researchers use a third route of infection, the intravenous route, since it allows a rapid dissemination to the brain, presumably by bypassing lung immune response (13, 14). Intravenous model in outbred mice have been shown to be a relevant model when compared to human infection (15-17).

In this study we compared intravenous, intratracheal and intranasal infection and observed that all produce rapid brain dissemination. Additionally, we detected that intranasal inoculation leads to presence of yeasts in upper respiratory airways and

110 auditory tract. These observations have important implications for the interpretation of  
111 intranasal studies when considering immune responses and aspects of pathogenesis.

112

## Materials and Methods:

*C. neoformans* was grown from frozen glycerol stocks into a Yeast Peptone Dextrose (YPD) plate for 2 days, and then cultured overnight at 30 °C in YPD broth with shaking. We used a strain from H99E lineage (available from Lodge laboratory), the H99O strain, a close relative of the original isolate of H99 (18), and the R265 strain of *C. gattii*, obtained from American Type Culture Collection.

C57BL/6J mice, aged 8–10 weeks, were obtained from Jackson Laboratories and infected with the indicated  $5 \times 10^3$  (low dose) to  $5 \times 10^5$  CFU (high dose) in a final volume of 40  $\mu$ l of sterile PBS (19). Intravenous (IV) injections were performed by 40  $\mu$ l injection in the retroorbital sinus of the animal under isoflurane anesthesia. Intranasal (IN) experiments were performed by placing 40  $\mu$ l of yeast suspension into the mouse nares while under isoflurane anesthesia (20). Intratracheal (IT) infections were performed under xylazine-ketamine anesthesia. Animal's neck was exposed, the trachea was exposed via midline incision and yeasts inoculated with a 25G gauge syringe directly into the trachea. Incision was closed with Vetbond (3M, St. Paul, MN, USA). Mice were monitored daily for signs of stress and deterioration of health throughout the experiment. All animal experiments were approved by Johns Hopkins University IACUC under protocol number MO18H152.

To measure fungal burden, mice were euthanized, exsanguinated via terminal retroorbital bleeding, tissues removed and macerated by passing through a 100  $\mu$ m mesh into sterile PBS. The tissue homogenate was then plated into YPD agar plates, and colony forming units (CFU) were quantified. For one experiment we rinsed the brains (to remove



possible yeast contaminations from the exterior surface of the brain during necropsy). In one experiment we included a non-infected mouse (“sentinel”) to test for accidental contamination of tools and materials during necropsy.

For histological analysis of the skull, the skin, lower jaw and tongue were removed and remainder of skull was fixed in Formacal and processed for routine histology. A sagittal cut was performed through the middle section of the mouse skull and consecutives 4 µm sections, with 40 µm intervals were cut for Hematoxylin-Eosin, Mucicarmine, Grocott-Methenamine Silver and immunofluorescence. For immunofluorescence 18B7 monoclonal antibody against capsular polysaccharides (21) was used and then detected with anti-mouse IgG<sub>1</sub>-Alexa 488 conjugate antibody. Hematoxylin & eosin sections were scanned using a slide scanner at the Oncology Tissue Services Core (School of Medicine, Johns Hopkins University). Remaining sections were imaged using an Olympus AX70 microscope (Olympus America, NY, USA). Image cropping and annotation were performed using ImageJ (22).

## Results:

We compared 3 routes of infection (IV, IN, and IT) to ascertain the kinetics of *C. neoformans* dissemination to the brain (Fig.1). We had previously verified the infectious dose of  $5 \times 10^5$  CFU induces 100% mortality in 22 days for H99E. We quantified fungal burden in blood, lung and brains. In two mice, we detected fungi in blood although in these we also detected bacteria in blood (data not shown). This suggests that animals with *C. neoformans* in the blood had severe systemic infection that may have predisposed to concomitant bacterial infection. We conclude that the majority of animals clear *C. neoformans* from the bloodstream. After 7 days of infection, we measured increased numbers of yeast cells in the brain after IV inoculation (more than  $10^5$ , upper limit of detection) than after IN or IT inoculation (below  $10^4$  CFU). In the lung there was a slight increase in fungal burden when the IT route is used, as compared to the IV route. We did not detect differences in brain fungal burden between IN and IT inoculation. Remarkably, we noted there was a substantial amount of yeast in mouse brains as early as day 3 after inoculation of yeast by both IN or IT, which prompted us to ask how quickly *C. neoformans* disseminates to the mouse brain.

We focused on the intranasal model since this procedure is non-invasive, requiring only brief anesthesia and no surgery. We found that 3 h post infection with  $5 \times 10^5$  yeast inoculum, the fungal burden in the brain was in the order of hundreds of CFU for most animals (Fig. 2A). The surprising finding that yeasts were detectable in the brain within hours after IN inoculation prompted us to perform additional controls. For one experiment we rinsed the brains (to remove possible yeast contaminations from

the exterior surface of the brain during necropsy) but we got comparable results to the first experiment (data pooled from both experiments is shown). We also culled one non-infected mouse (“sentinel”) at the end of the experiment to measure eventual contamination of tools and materials during necropsy that could cross-contaminate the media plates. We recovered no CFU from the sentinel mouse which gave us confidence that the fungal burden we detect are result from brain infection and not accidental contamination (data not shown). To investigate if early dissemination could occur at lower doses we infected animals with  $5 \times 10^3$  CFU (at this dose *C. neoformans* causes 80% mortality at 40 days). We still observed quick dissemination to the brain, indicating that this was not a consequence of exposure to overwhelmingly high numbers of yeasts. Finally, we observed quick dissemination to the brain with strain H99O, a strain closely related to the original H99 clinical isolate of *C. neoformans*, as well as the R265 strain of *C. gattii*, the strain associated with the Vancouver outbreak (Fig. 2B). It is possible that the detected yeast burden is arrested in the small capillaries (23-26), or in the post-capillary venules (27) and has not yet invaded the brain parenchyma. However, this is consistent with invasion of the brain since upon arrest in capillaries, *C. neoformans* quickly crosses endothelial barriers (24) and possibly the blood brain-barrier. These experiments show that after intranasal infection, pathogenic strains of *C. neoformans* and *C. gattii* disseminate to the mouse brain in as little as 3 h.

To confirm presence of yeast in the brain, we performed immunofluorescence in skulls of infected mice, using a monoclonal antibody against *C. neoformans* capsular GXM (21). In agreement with the results of CFU quantification, we detected yeast cells (positive immunostaining and with typical morphology) in the mouse brain at 24 h post

infection (Fig. 3A, inset). We wondered if it was possible for *C. neoformans* could provoke damage to the nose mucosa and from there access the brain through damaging the olfactory mucosa and using the olfactory nerves to traverse the cribriform plate (as shown for bacterial pathogens (28, 29) or if after damage the mucosa access the host bloodstream for dissemination. We reasoned that if dissemination occurred through the olfactory system, then the olfactory bulb would contain the majority of yeasts, compared to the remainder of the brain. We infected mice and separated their olfactory bulb from the remainder of the brain (Fig. 3B). We found that the olfactory bulb contains similar amounts of yeasts to the remainder of the brain, despite its small size compared to the rest of the brain.

To investigate the interaction of *C. neoformans* with the nose, and possible damage to the nose mucosa that could facilitate dissemination, we performed histological studies using a combination of histology, immunofluorescence, Grocott-Merwald-Silver, and mucicarmine (Fig. 4). We found yeasts scattered throughout the entire upper respiratory tract, particularly in the turbinates of the nose, and some yeasts close to the cribriform plate (Fig. 4A-C), as well as in the ear canals of mice (Fig. 4D). Yeasts were abundant in airways, surrounded with a material that is likely mucus secretions from the host, but that stained abundantly with capsular GXM antibody, indicating a component of secreted polysaccharide in the airways (Fig. 4B). Budding forms rested on the respiratory epithelium cilia and olfactory epithelium layer, and yeast numbers increased in number from 3 h to the 24 h post infection and increased immunostaining of GXM (Fig. 4F). We noted at 24 h post infection there were rare enlarged yeast cells within the nose turbinates and ears (Fig. 4C-G) whose cell body

217 diameter is above 10  $\mu\text{m}$ , and therefore can be consider titan cells (30-32). The finding  
 218 of titan cells in the nose of mice is concordant with Lima *et al.*, (33) which found  
 219 enlarged cells in noses of guinea pigs after some days of infection. Histopathology  
 220 analysis detected no damage to the host epithelial layers as well as no inflammatory  
 221 infiltrate from 3 h to 24 h post infection; it seems that either yeasts go undetected or  
 222 they do not cause enough tissue damage to trigger inflammation in murine host in the  
 223 early stages of infection. We conclude that, up to 24 h post-infection, presence of *C.*  
 224 *neoformans* in nose of mice causes minimal, if any, damage to nose mucosa and the  
 225 nose shows no sign of inflammation at this stage of infection.

## 226 Discussion:

227 Animal models of infection are critical tools for understanding the pathogenesis of  
 228 infectious diseases. In the cryptococcal field, mice are the most commonly used  
 229 mammalian species to study pathogenesis and immune responses. We compared the  
 230 kinetics of brain dissemination in three models of cryptococcal infection that are  
 231 commonly used: IV, IN and IT. We were particularly interested in IN infection since this  
 232 approach has become increasingly popular in the field. We found early dissemination to  
 233 the brain and colonization of upper respiratory tract by *C. neoformans* and *C. gattii*. Our  
 234 data suggest early invasion of the brain and a colonization of the nose by both  
 235 cryptococcal species in mouse models.

236 Quick dissemination to the brain observed in our mouse model is compatible with  
 237 an hematogenous route of dissemination. Recent work has proposed that escape from  
 238 the lungs occurs due to phagocyte drainage through the lymphatic system (34). It has  
 239 not yet been shown how *C. neoformans* escapes from the lymph nodes into the  
 240 bloodstream (35-37), but this will likely be elucidated in the future. We detected no  
 241 yeasts in the circulating blood of mice, which raises a question of how the bloodstream  
 242 is so quickly invaded and quickly cleared. Other groups observed that in IV infection  
 243 fungi are cleared from the bloodstream in hours or the day after infection (27, 35), with  
 244 fungemia only resurfacing very late in the infection. These observations, together with  
 245 ours, imply that yeast transit time in blood is very short (25). The short transit time is  
 246 seemingly due to arrest of yeasts within small capillaries, as can occur in the ears of  
 247 mice (24) and in the lumen of leptomeningeal capillaries (24, 27). Yeasts arrested in

capillaries would not be detected by our methodology. In contrast, others found that blood contains both free yeast cells as well as yeast cells in the buffy coat, i.e., engulfed by phagocytic immune cells, for up to 20 days post-inoculation. Depletion of mononuclear phagocytes decreases the number of yeasts brain detected in the brain (23, 26, 34, 35). Regardless of the short transit time, there is sufficient experimental evidence to support that dissemination to the brain occurs via the hematogenous route, by direct crossing of the blood brain barrier by free yeast cells, and by indirect carriage within host mononuclear phagocytes, the Trojan-horse transport.

In models of intravenous (IV) inoculation, yeast dissemination to the brain occurs as early as 90 min after inoculation (36) (38). The speed of *C. neoformans* dissemination to the brain was attributed to the intravenous inoculation model that can simulate fungemia, an event that occurs very late in natural infections. Our findings confirm that IV infection disseminated more efficiently to the brain, but all infection routes lead to presence of viable yeasts within the brain as early as 3 h post infection. Others had detected yeasts in the brain after intranasal infection as early as 3 d (39). We did not experimentally confirm the same quick dissemination to the brain occurs with intratracheal infection, but we expect the intratracheal route of infection to be similar to the intranasal route for 2 reasons: i) at day 3 the fungal burden was similar for both routes; ii) due to sneezing (and possibly coughing reflexes), inoculation into the trachea would quickly spread *C. neoformans* throughout the entire upper respiratory tract. It is our view that once the lungs are infected, the entire upper respiratory tract becomes infected. Therefore, we believe that brain dissemination occurs very rapidly and possibly in a matter of hours, irrespective of the infection route used. This finding

271 and others (34, 39) establish that cryptococcal brain dissemination occurs early (a  
272 matter of few hours) and simultaneously with lung infection.

273 After noting early dissemination post-intranasal inoculation we wondered if a  
274 route of dissemination through a nasal-olfactory system could be used by *C.*  
275 *neoformans*. Both *Burkholderia pseudomallei* and *Listeria monocytogenes* can reach  
276 the brain via damage to the olfactory mucosa and travelling upwards through the  
277 olfactory nerve tracts as well as other cranial nerves (28, 29). *Neisseria meningitidis*  
278 invades mouse brains by damaging the olfactory epithelium and travelling along the  
279 olfactory tract, through the cribriform plate, to invade the brain (40). The filamentous  
280 fungus *Mucor* invades the facial blood vessels from the sinus to reach the eye, the  
281 cranial nerves and the brain. In the case of *C. neoformans*, the possibility of brain  
282 dissemination through the nose has been pursued previously (41). In mice, yeast cells  
283 were observed along the olfactory nerve and the meninges starting at day 3 post  
284 intranasal instillation (41). Our study differs from this previous study because we  
285 focused on the earliest stages of infection and found no evidence of an upward invasion  
286 of the brain. We observed no signs of mucosal damage and no inflammation in the nose  
287 cavity, despite the presence of abundant yeasts and secreted GXM. In interpreting  
288 these results, we relied on the terminology of the damage-response framework that  
289 defines infection as the acquisition of the microbe by the host and colonization as a  
290 state where the damage resulting from the host-microbe interaction is insufficient to  
291 affect homeostasis (42). From this perspective, the lack of visible damage suggests that  
292 infection leads simply to nasal colonization and not overt disease. Given the lack of  
293 damage and inflammatory infiltrate our findings do not support the notion that invasion



294 of nasal structures is involved in dissemination of *C. neoformans*. Nevertheless,  
295 intranasal inoculation results in nasal colonization where fungal cells may later interact  
296 with local immune defenses and potentially affect the development of the immune  
297 response.

298         Animal models show that some animals can harbor *C. neoformans* in nose for  
299 extended periods of time. Intranasal instillation resulted in yeast cells detected in the  
300 nasal cavities for periods up to 1 month of both mice and rats (43) and this infection is  
301 large enough to be detected by whole-animal non-invasive imaging as early as 1.5  
302 weeks after infection (39). In immunocompetent laboratory-mice infected intranasally,  
303 yeasts can be detected up to 90 d after instillation (44), and guinea pigs carried *C.*  
304 *neoformans* in nose for several weeks (33). Some strains of *C. neoformans* are  
305 rhinotropic, with the onset of nasal lesions occurring very late in the disease in  
306 laboratory infected mice (45). Further, *C. neoformans* is frequently detected in nose of  
307 animals outside of the laboratory setting. Asymptomatic nasal carriage of *C.*  
308 *neoformans* has been reported in cats, dogs and koalas (46, 47). The percentage of  
309 positive animals can reach as high as 95%, as reported for feral cats in Italy (48). *C.*  
310 *gattii* is also quite frequent in animals, with British Columbia region having positive nasal  
311 swabs in 4% and 7% of the cat and dog population, respectively (49). In conclusion,  
312 there is evidence that *C. neoformans* can survive and even colonize upper respiratory  
313 tract of some felines and rodents, including mice, a common experimental model. This  
314 frequent colonization is associated with disease since cryptococcosis is infrequent in  
315 species such as cats (50) but relatively prevalent in koalas (47). Frequent detection of  
316 *C. neoformans* in wild animals and the prolonged detection of *C. neoformans* in noses

317 of laboratory animals shows that *C. neoformans* (and perhaps other *Cryptococcus*  
318 species) colonizes the upper airways of animals.

319 Serological studies indicate that humans are exposed to *C. neoformans* at an  
320 early age (7), and that *C. neoformans* can reside in the lungs in a latent form (9). Non-  
321 pathogenic species of *Cryptococcus* spp. were identified in several body sites: healthy  
322 scalps (51), in mouths of 20% of the healthy population (52), in skin of children (53), and  
323 in breast milk (54). Lung transplant patients or bronchiectasis patients frequently identify  
324 the presence of *Cryptococcus*, but no pathogenic species (55, 56). Indeed, pathogenic  
325 species of *Cryptococcus* spp. are rarely found in microbiome studies. In nose and upper  
326 respiratory tract the majority of studies (57-62) reported no *Cryptococcus* spp isolates  
327 from nasal cultures, while one study found rare *Cryptococcus* spp. (and no *C.*  
328 *neoformans*) by culturing nasal cavity lavages (63). There is one notable exception:  
329 high-throughput sequencing identified *Cryptococcus neoformans* as the most abundant  
330 fungal species in the middle meatus in 60% of healthy patients and 90% of chronic  
331 rhinosinusitis patients in St. Louis, Missouri, USA (64). The explanation for this striking  
332 exception is unknown and potentially may be a technical problem. Overall, *C.*  
333 *neoformans* is rarely recovered from healthy humans. In contrast, *C. neoformans* is  
334 frequently isolated from upper respiratory tract of some felines. This discrepancy is  
335 likely due to a combination of increased exposure of animals to environmental  
336 reservoirs of *C. neoformans* as well as immunological differences in host-species.  
337 However this is a surprising finding since animal disease has so far recapitulated  
338 human disease (13, 15, 65).

339           In summary, our study shows the presence of the colonization of the upper  
 340   respiratory tract of *C. neoformans* in mouse models with rapid dissemination to the  
 341   brain, independently of the infection route. The rapid appearance of yeast cells in  
 342   different body compartments where they initiate local immune responses suggests  
 343   caution in associating a particular systemic response with a specific tissue. At the very  
 344   least, our findings suggest the need to revisit long held views on cryptococcal  
 345   pathogenesis in animal models of infection using the most modern cellular and  
 346   immunological tools.

347

## 348 **Acknowledgements**

349 The authors wish to thank Oncology Tissue Services of Johns Hopkins University for  
350 the histology and use of Tissue Scanner facilities. The authors thank the Johns Hopkins  
351 Phenotyping Core and Professor Cory Brayton for the histopathological analysis.

352

## 353 **Funding information**

354 AC was supported by National Institutes of Health (NIH) awards 5R01HL059842,  
355 5R01AI033774, 5R37AI033142, and 5R01AI052733. EC was supported by a  
356 postdoctoral fellowship from the Johns Hopkins Malaria Research Institute.

357

## 358 References:

- 359 1. **Hagen F, Khayhan K, Theelen B, Kolecka A, Polacheck I, Sionov E, Falk R,**  
360 **Parnmen S, Lumbsch HT, Boekhout T.** 2015. Recognition of seven species in  
361 the *Cryptococcus gattii*/*Cryptococcus neoformans* species complex. *Fungal Genet*  
362 *Biol* **78**:16–48.
- 363 2. **Kwon-Chung KJ, Bennett JE, Wickes BL, Meyer W, Cuomo CA, Wollenburg**  
364 **KR, Bicanic TA, Castañeda E, Chang YC, Chen J, Cogliati M, Dromer F, Ellis**  
365 **D, Filler SG, Fisher MC, Harrison TS, Holland SM, Kohno S, Kronstad JW,**  
366 **Lazera M, Levitz SM, Lionakis MS, May RC, Ngamskulrongoj P, Pappas PG,**  
367 **Perfect JR, Rickerts V, Sorrell TC, Walsh TJ, Williamson PR, Xu J, Zelazny**  
368 **AM, Casadevall A.** 2017. The Case for Adopting the “Species Complex”  
369 Nomenclature for the Etiologic Agents of Cryptococcosis. *mSphere* **2**.
- 370 3. **Bartlett KH, Cheng P-Y, Duncan C, Galanis E, Hoang L, Kidd S, Lee M-K,**  
371 **Lester S, MacDougall L, Mak S, Morshed M, Taylor M, Kronstad J.** 2012. A  
372 decade of experience: *Cryptococcus gattii* in British Columbia. *Mycopathologia*  
373 **173**:311–319.
- 374 4. **Baker RD, Haugen RK.** 1955. Tissue changes and tissue diagnosis in  
375 cryptococcosis; a study of 26 cases. *American journal of clinical pathology* **25**:14–  
376 24.
- 377 5. **Chen LC, Goldman DL, Doering TL, Pirofski LA, Casadevall A.** 1999. Antibody  
378 response to *Cryptococcus neoformans* proteins in rodents and humans. *Infect*  
379 *Immun* **67**:2218–2224.
- 380 6. **Muchmore HG, Felton FG, Salvin SB, Rhoades ER.** 1968. Delayed  
381 hypersensitivity to cryptococcin in man. *Sabouraudia* **6**:285–288.
- 382 7. **Goldman DL, Khine H, Abadi J, Lindenberg DJ, Pirofski L, Niang R,**  
383 **Casadevall A.** 2001. Serologic evidence for *Cryptococcus neoformans* infection  
384 in early childhood. *Pediatrics* **107**:E66.
- 385 8. **Abadi J, Pirofski LA.** 1999. Antibodies reactive with the cryptococcal capsular  
386 polysaccharide glucuronoxylomannan are present in sera from children with and  
387 without human immunodeficiency virus infection. *J Infect Dis* **180**:915–919.
- 388 9. **Dromer F, Mathoulin-Pélissier S, Fontanet A, Ronin O, Dupont B, Lortholary**  
389 **O, French Cryptococcosis Study Group.** 2004. Epidemiology of HIV-associated  
390 cryptococcosis in France (1985-2001): comparison of the pre- and post-HAART  
391 eras. *Aids* **18**:555–562.

- 392 10. **Henao-Martínez AF, Beckham JD.** 2015. Cryptococcosis in solid organ  
393 transplant recipients. *Curr Opin Infect Dis* **28**:300–307.
- 394 11. **Singh N, Alexander BD, Lortholary O, Dromer F, Gupta KL, John GT, del**  
395 **Busto R, Klintmalm GB, Somani J, Lyon GM, Pursell K, Stosor V, Munoz P,**  
396 **Limaye AP, Kalil AC, Pruett TL, Garcia-Diaz J, Humar A, Houston S, House**  
397 **AA, Wray D, Orloff S, Dowdy LA, Fisher RA, Heitman J, Wagener MM,**  
398 **Husain S.** 2008. Pulmonary cryptococcosis in solid organ transplant recipients:  
399 clinical relevance of serum cryptococcal antigen. *Clinical infectious diseases*  
400 **46**:e12–8.
- 401 12. **Baddley JW, Schain DC, Gupte AA, Lodhi SA, Kayler LK, Frade JP, Lockhart**  
402 **SR, Chiller T, Bynon JSJ, Bower WA.** 2011. Transmission of *Cryptococcus*  
403 *neoformans* by Organ Transplantation. *Clinical infectious diseases* **52**:E94–E98.
- 404 13. **Mukaremera L, McDonald TR, Nielsen JN, Molenaar CJ, Akampurira A,**  
405 **Schutz C, Taseera K, Muzoora C, Meintjes G, Meya DB, Boulware DR,**  
406 **Nielsen K.** 2019. The Mouse Inhalation Model of *Cryptococcus neoformans*  
407 Infection Recapitulates Strain Virulence in Humans and Shows that Closely  
408 Related Strains Can Possess Differential Virulence. *Infect Immun* **87**:1694.
- 409 14. **Goldman DL, Lee SC, Mednick AJ, Montella L, Casadevall A.** 2000. Persistent  
410 *Cryptococcus neoformans* pulmonary infection in the rat is associated with  
411 intracellular parasitism, decreased inducible nitric oxide synthase expression, and  
412 altered antibody responsiveness to cryptococcal polysaccharide. *Infect Immun*  
413 **68**:832–838.
- 414 15. **Chrétien F, Lortholary O, Kansau I, Neuville S, Gray F, Dromer F.** 2002.  
415 Pathogenesis of cerebral *Cryptococcus neoformans* infection after fungemia. *J*  
416 *Infect Dis* **186**:522–530.
- 417 16. **Lortholary O, Improvisi L, Nicolas M, PROVOST F, Dupont B, Dromer F.**  
418 1999. Fungemia during murine cryptococcosis sheds some light on  
419 pathophysiology. *Medical mycology : official publication of the International*  
420 *Society for Human and Animal Mycology* **37**:169–174.
- 421 17. **Alanio A, Desnos-Ollivier M, Dromer F.** 2011. Dynamics of *Cryptococcus*  
422 *neoformans*-macrophage interactions reveal that fungal background influences  
423 outcome during cryptococcal meningoencephalitis in humans. *MBio* **2**.
- 424 18. **Arras SDM, Ormerod KL, Erpf PE, Espinosa MI, Carpenter AC, Blundell RD,**  
425 **Stowasser SR, Schulz BL, Tanurdzic M, Fraser JA.** 2017. Convergent  
426 microevolution of *Cryptococcus neoformans* hypervirulence in the laboratory and  
427 the clinic. *Scientific reports* **7**:17918.
- 428 19. **Rivera J, Mukherjee J, Weiss LM, Casadevall A.** 2002. Antibody efficacy in  
429 murine pulmonary *Cryptococcus neoformans* infection: a role for nitric oxide.  
430 *Journal of immunology* **168**:3419–3427.

20. **Hommel B, Mukaremera L, Cordero RJB, Desjardins CA, Sturny-Leclère A, Perfect J, Fraser JA, Casadevall A, Cuomo CA, Dromer F, Nielsen K, Alanio A.** 2017. Identification of environmental and genetic factors important for *Cryptococcus neoformans* titan cell formation using new in vitro inducing conditions. *bioRxiv* 191668.
21. **Casadevall A, Cleare W, Feldmesser M, Glatman-Freedman A, Goldman DL, Kozel TR, Lendvai N, Mukherjee J, Pirofski LA, Rivera J, Rosas AL, Scharff MD, Valadon P, Westin K, Zhong Z.** 1998. Characterization of a murine monoclonal antibody to *Cryptococcus neoformans* polysaccharide that is a candidate for human therapeutic studies. *Antimicrobial agents and chemotherapy* **42**:1437–1446.
22. **Schneider CA, Rasband WS, Eliceiri KW.** 2012. NIH Image to ImageJ: 25 years of image analysis. *Nat Methods* **9**:671–675.
23. **Santiago-Tirado FH, Onken MD, Cooper JA, Klein RS, Doering TL.** 2017. Trojan Horse Transit Contributes to Blood-Brain Barrier Crossing of a Eukaryotic Pathogen. *MBio* **8**.
24. **Shi M, Li SS, Zheng C, Jones GJ, Kim KS, Zhou H, Kubes P, Mody CH.** 2010. Real-time imaging of trapping and urease-dependent transmigration of *Cryptococcus neoformans* in mouse brain. *The Journal of clinical investigation* **120**:1683–1693.
25. **Shi M, Colarusso P, Calaruso P, Mody CH.** 2012. Real-time in vivo imaging of fungal migration to the central nervous system. *Cellular microbiology* **14**:1819–1827.
26. **Sorrell TC, Juillard P-G, Djordjevic JT, Kaufman-Francis K, Dietmann A, Milonig A, Combes V, Grau GER.** 2016. Cryptococcal transmigration across a model brain blood-barrier: evidence of the Trojan horse mechanism and differences between *Cryptococcus neoformans* var. *grubii* strain H99 and *Cryptococcus gattii* strain R265. *Microbes and infection / Institut Pasteur* **18**:57–67.
27. **Kaufman-Francis K, Djordjevic JT, Juillard P-G, Lev S, Desmarini D, Grau GER, Sorrell TC.** 2018. The Early Innate Immune Response to, and Phagocyte-Dependent Entry of, *Cryptococcus neoformans* Map to the Perivascular Space of Cortical Post-Capillary Venules in Neurocryptococcosis **188**:1653–1665.
28. **St John JA, Ekberg JAK, Dando SJ, Meedeniya ACB, Horton RE, Batzloff M, Owen SJ, Holt S, Peak IR, Ulett GC, Mackay-Sim A, Beacham IR.** 2014. *Burkholderia pseudomallei* penetrates the brain via destruction of the olfactory and trigeminal nerves: implications for the pathogenesis of neurological melioidosis. *MBio* **5**:e00025.

- 469 29. **Pägelow D, Chhatbar C, Beineke A, Liu X, Nerlich A, van Vorst K, Rohde M,**  
470 **Kalinke U, Förster R, Halle S, Valentin-Weigand P, Hornef MW, Fulde M.**  
471 2018. The olfactory epithelium as a port of entry in neonatal neurolisteriosis. *Nat*  
472 *Commun* **9**:4269.
- 473 30. **Hommel B, Mukaremera L, Cordero RJB, Coelho C, Desjardins CA, Sturny-**  
474 **Leclère A, Janbon G, Perfect JR, Fraser JA, Casadevall A, Cuomo CA,**  
475 **Dromer F, Nielsen K, Alanio A.** 2018. Titan cells formation in *Cryptococcus*  
476 *neoformans* is finely tuned by environmental conditions and modulated by positive  
477 and negative genetic regulators. *PLoS pathogens* **14**:e1006982.
- 478 31. **Trevijano-Contador N, de Oliveira HC, García-Rodas R, Rossi SA, Llorente I,**  
479 **Zaballos A, Janbon G, Arino J, Zaragoza O.** 2018. *Cryptococcus neoformans*  
480 can form titan-like cells in vitro in response to multiple signals. *PLoS pathogens*  
481 **14**:e1007007.
- 482 32. **Dambuza IM, Drake T, Chapuis A, Zhou X, Correia J, Taylor-Smith L,**  
483 **LeGrave N, Rasmussen T, Fisher MC, Bicanic T, Harrison TS, Jaspars M,**  
484 **May RC, Brown GD, Yucel R, Maccallum DM, Ballou ER.** 2018. The  
485 *Cryptococcus neoformans* Titan cell is an inducible and regulated morphotype  
486 underlying pathogenesis. *PLoS pathogens* **14**:e1006978.
- 487 33. **Lima C, Vital JP.** 1994. Olfactory mucosa response in guinea pigs following  
488 intranasal instillation with *Cryptococcus neoformans*. A histological and  
489 immunocytochemical study. *Mycopathologia* **126**:65–73.
- 490 34. **Walsh NM, Botts MR, McDermott AJ, Ortiz SC, Wüthrich M, Klein B, Hull CM.**  
491 2019. Infectious particle identity determines dissemination and disease outcome  
492 for the inhaled human fungal pathogen *Cryptococcus*. *PLoS pathogens*  
493 **15**:e1007777.
- 494 35. **Charlier C, Nielsen K, Daou S, Brigitte M, Chrétien F, Dromer F.** 2009.  
495 Evidence of a role for monocytes in dissemination and brain invasion by  
496 *Cryptococcus neoformans*. *Infect Immun* **77**:120–127.
- 497 36. **Chrétien F, Lortholary O, Kansau I, Neuville S, Gray F, Dromer F.** 2002.  
498 Pathogenesis of Cerebral *Cryptococcus neoformans* Infection after Fungemia. *J*  
499 *Infect Dis* **186**:522–530.
- 500 37. **Lortholary O, Improvisi L, Nicolas M, PROVOST F, Dupont B, Dromer F.**  
501 2009. Fungemia during murine cryptococcosis sheds some light on  
502 pathophysiology. *Medical Mycology* **37**:169–174.
- 503 38. **Neal LM, Xing E, Xu J, Kolbe JL, Osterholzer JJ, Segal BM, Williamson PR,**  
504 **Olszewski MA.** 2017. CD4+ T Cells Orchestrate Lethal Immune Pathology  
505 despite Fungal Clearance during *Cryptococcus neoformans* Meningoencephalitis.  
506 *MBio* **8**.



- 507 39. **Vanherp L, Ristani A, Poelmans J, Hillen A, Lagrou K, Janbon G, Brock M,**  
508 **Himmelreich U, Vande Velde G.** 2019. Sensitive bioluminescence imaging of  
509 fungal dissemination to the brain in mouse models of cryptococcosis. *Dis Model*  
510 *Mech* **12**:dmm039123.
- 511 40. **Dando SJ, Mackay-Sim A, Norton R, Currie BJ, St John JA, Ekberg JAK,**  
512 **Batzloff M, Ulett GC, Beacham IR.** 2014. Pathogens penetrating the central  
513 nervous system: infection pathways and the cellular and molecular mechanisms  
514 of invasion. *Clin Microbiol Rev*, 3rd ed. **27**:691–726.
- 515 41. **Gomes NGL, Boni M, Primo CC.** 1997. The invasive behaviour of shape  
516 *Cryptococcus neoformans*: a possibility of direct access to the central nervous  
517 system? *Mycopathologia* **140**:1–11.
- 518 42. **Pirofski L-A, Casadevall A.** 2017. Immune-Mediated Damage Completes the  
519 Parabola: *Cryptococcus neoformans* Pathogenesis Can Reflect the Outcome of a  
520 Weak or Strong Immune Response. *MBio* **8**.
- 521 43. **Kuttin ES, Feldman M, Nyska A, Weissman BA, Müller J, Levine HB.** 1988.  
522 Cryptococcosis of the nasopharynx in mice and rats. *Mycopathologia* **101**:99–104.
- 523 44. **Anderson DA, Sagha HM.** 1988. Persistence of infection in mice inoculated  
524 intranasally with *Cryptococcus neoformans*. *Mycopathologia* **104**:163–169.
- 525 45. **Dixon DM, Polak A.** 1986. In vivo and in vitro studies with an atypical, rhinotropic  
526 isolate of *Cryptococcus neoformans*. *Mycopathologia* **96**:33–40.
- 527 46. **Malik R, Wigney DI, Muir DB, Love DN.** 1997. Asymptomatic carriage of  
528 *Cryptococcus neoformans* in the nasal cavity of dogs and cats. *Journal of medical*  
529 *and veterinary mycology : bi-monthly publication of the International Society for*  
530 *Human and Animal Mycology* **35**:27–31.
- 531 47. **Kido N, Makimura K, Kamegaya C, Shindo I, Shibata E, Omiya T, Yamamoto**  
532 **Y.** 2012. Long-term surveillance and treatment of subclinical cryptococcosis and  
533 nasal colonization by *Cryptococcus neoformans* and *C. gattii* species complex in  
534 captive koalas (*Phascolarctes cinereus*). *Medical Mycology*, 1st ed. **50**:291–298.
- 535 48. **Danesi P, Furnari C, Granato A, Schivo A, Otranto D, Capelli G, Cafarchia C.**  
536 2014. Molecular identity and prevalence of *Cryptococcus* spp. nasal carriage in  
537 asymptomatic feral cats in Italy. *Medical Mycology* **52**:667–673.
- 538 49. **Duncan C, Stephen C, Lester S, Bartlett KH.** 2005. Sub-clinical infection and  
539 asymptomatic carriage of *Cryptococcus gattii* in dogs and cats during an outbreak  
540 of cryptococcosis. *Medical mycology : official publication of the International*  
541 *Society for Human and Animal Mycology* **43**:511–516.
- 542 50. **Pennisi MG, Hartmann K, Lloret A, Ferrer L, Addie D, Belák S, Boucraut-**  
543 **Baralon C, Egberink H, Frymus T, Gruffydd-Jones T, Hosie MJ, Lutz H,**

- 544 **Marsilio F, Möstl K, Radford AD, Thiry E, Truyen U, Horzinek MC.** 2013.  
545 Cryptococcosis in cats. *Journal of Feline Medicine and Surgery*, 4 ed. **15**:611–  
546 618.
- 547 51. **Park HK, Ha M-H, Park S-G, Kim MN, Kim BJ, Kim W.** 2012. Characterization  
548 of the fungal microbiota (mycobiome) in healthy and dandruff-afflicted human  
549 scalps. *PloS one* **7**:e32847.
- 550 52. **Ghannoum MA, Jurevic RJ, Mukherjee PK, Cui F, Sikaroodi M, Naqvi A,**  
551 **Gillevet PM.** 2010. Characterization of the Oral Fungal Microbiome (Mycobiome)  
552 in Healthy Individuals. *PLoS pathogens* **6**:e1000713.
- 553 53. **Jo J-H, Deming C, Kennedy EA, Conlan S, Polley EC, Ng W-I, NISC**  
554 **Comparative Sequencing Program, Segre JA, Kong HH.** 2016. Diverse  
555 Human Skin Fungal Communities in Children Converge in Adulthood. *J Invest*  
556 *Dermatol* **136**:2356–2363.
- 557 54. **Boix-Amorós A, Puente-Sánchez F, Toit du E, Linderborg KM, Zhang Y,**  
558 **Yang B, Salminen S, Isolauri E, Tamames J, Mira A, Collado MC.** 2019.  
559 Mycobiome Profiles in Breast Milk from Healthy Women Depend on Mode of  
560 Delivery, Geographic Location, and Interaction with Bacteria. *Applied and*  
561 *environmental microbiology* **85**:28.
- 562 55. **Charlson ES, Diamond JM, Bittinger K, Fitzgerald AS, Yadav A, Haas AR,**  
563 **Bushman FD, Collman RG.** 2012. Lung-enriched organisms and aberrant  
564 bacterial and fungal respiratory microbiota after lung transplant. *Am J Respir Crit*  
565 *Care Med* **186**:536–545.
- 566 56. **Mac Aogáin M, Chandrasekaran R, Lim AYH, Low TB, Tan GL, Hassan T,**  
567 **Ong TH, Ng AHQ, Bertrand D, Koh JY, Pang SL, Lee ZY, Gwee XW, Martinus**  
568 **C, Sio YY, Matta SA, Chew FT, Keir HR, Connolly JE, Abisheganaden JA,**  
569 **Koh MS, Nagarajan N, Chalmers JD, Chotirmall SH.** 2018. Immunological  
570 corollary of the pulmonary mycobiome in bronchiectasis: the CAMEB study.  
571 *European Respiratory Journal* **52**:1800766.
- 572 57. **Cleland EJ, Bassiouni A, Bassioni A, Boase S, Dowd S, Vreugde S, Wormald**  
573 **P-J.** 2014. The fungal microbiome in chronic rhinosinusitis: richness, diversity,  
574 postoperative changes and patient outcomes. *Int Forum Allergy Rhinol* **4**:259–  
575 265.
- 576 58. **Ragab A, Clement P, Vincken W, Nolard N, Simones F.** 2006. Fungal cultures  
577 of different parts of the upper and lower airways in chronic rhinosinusitis.  
578 *Rhinology* **44**:19–25.
- 579 59. **Braun H, Buzina W, Freudenschuss K, Beham A, Stammberger H.** 2003.  
580 “Eosinophilic fungal rhinosinusitis”: a common disorder in Europe? The  
581 *Laryngoscope* **113**:264–269.

- 582 60. **Jain S, Das S, Gupta N, Malik JN.** 2013. Frequency of fungal isolation and  
583 antifungal susceptibility pattern of the fungal isolates from nasal polyps of chronic  
584 rhinosinusitis patients at a tertiary care centre in north India. *Medical Mycology*  
585 **51**:164–169.
- 586 61. **Chalermwatanachai T, Zhang N, Holtappels G, Bachert C.** 2015. Association  
587 of Mucosal Organisms with Patterns of Inflammation in Chronic Rhinosinusitis.  
588 *PloS one* **10**:e0136068.
- 589 62. **Jung WH, Croll D, Cho JH, Kim YR, Lee YW.** 2015. Analysis of the nasal  
590 vestibule mycobiome in patients with allergic rhinitis. *Mycoses* **58**:167–172.
- 591 63. **Ponikau JU, Sherris DA, Kern EB, Homburger HA, Frigas E, Gaffey TA,**  
592 **Roberts GD.** 1999. The diagnosis and incidence of allergic fungal sinusitis. *Mayo*  
593 *Clin Proc* **74**:877–884.
- 594 64. **Aurora R, Chatterjee D, Hentzleman J, Prasad G, Sindwani R, Sanford T.**  
595 2013. Contrasting the microbiomes from healthy volunteers and patients with  
596 chronic rhinosinusitis. *JAMA Otolaryngol Head Neck Surg* **139**:1328–1338.
- 597 65. **Goldman D, Lee SC, Casadevall A.** 1994. Pathogenesis of pulmonary  
598 *Cryptococcus neoformans* infection in the rat. *Infect Immun* **62**:4755–4761.
- 599

## Figure Legends:

**Figure 1. *C. neoformans* dissemination to the brain and lung after different inoculation routes.** Mice were infected with  $5 \times 10^5$  H99E strain of *C. neoformans* via intravenous (IV), intranasal (IN) and intratracheal (IT) route. Colony forming units (CFU) analyzed at A) 3 days post infection (dpi) and, B) 7 dpi. Each data point represents one individual mouse and bars represent mean and SD. Numbers represent P-values calculated from two-stage linear step-up procedure of Benjamini, Krieger and Yekutieli, with  $Q = 5\%$ , as compared to IV infection.

**Figure 2. *C. neoformans* is detected in the brain as early as 3 h post infection (hpi) after IN infection.** A) Mice were infected with either  $5 \times 10^5$  CFU (High dose) or  $5 \times 10^3$  CFU (Low dose) of H99E via intranasal instillation and euthanized at the indicated time to measure yeast tissue burden. B) Mice were infected with H99O strain of *C. neoformans* or R265 strain of *C. gattii*. Each data point represents one individual mouse and bars represent mean and SD.

**Figure 3. *C. neoformans* is detected in the brain and the olfactory bulb as early as 3 h post infection (hpi) after IN infection.** A) Mice were infected with  $5 \times 10^5$  CFU of *C. neoformans* via intranasal instillation, euthanized at the indicated time, and processed for histology. Yeast cells could be observed in the olfactory bulb of the brain of mice at 24 hpi (top panel, arrows). Non-infected animals were processed under the same

conditions to show specificity of staining of yeast capsular immunofluorescence (bottom panel). B) Mice were infected with high dose of *C. neoformans*. At the indicated hpi, olfactory bulb was separated from the remainder of the brain (illustrated in right panel) and CFU were counted (left panel). Each data point represents one individual mouse and bars represent mean and SD. Numbers represent P-values calculated from two-stage linear step-up procedure of Benjamini, Krieger and Yekutieli, with Q = 5%.

**Figure 4. Histopathology of mouse nasal cavities upon *C. neoformans* infection.**

Colonization and secretion of GXM in airways of mice. Enlarged yeasts could be observed in airways and in ears. Mice were infected with  $5 \times 10^5$  CFU of H99E or H99O strains (as indicated) of *C. neoformans* via intranasal instillation, euthanized at the indicated time and processed for histology. Immunofluorescence staining of medial sagittal cuts of mouse skulls after staining with DAPI nuclear counterstain and anti-GXM-monoclonal antibody 18B7. A) Aspects of the cribriform plate and the nose turbinates showing yeasts in the airway. B) Accumulation of GXM in the nose mucosa. Specificity of staining was confirmed by performing immunostaining in a non-infected mouse (not shown); C) Grocott-Methenamine Silver staining (left, middle) and immunofluorescence (right panels) showing enlarged yeast cells in nose airways (arrowheads). D) Grocott-Methenamine Silver staining showing enlarged yeast cells in auditory canal (arrowhead, left panel) as well as abundant yeasts in auditory canals (right panel). Scale bars 25  $\mu$ m. E) Hematoxylin-eosin staining of entire skull (left) (3 h post-infection). F) quantification of yeasts in nose and yeasts in airways. G) Aspect of nose mucosa, close to cribriform

643 plate (24h post-infection), displaying lack of inflammation and showing enlarged yeast  
644 cells (inset).

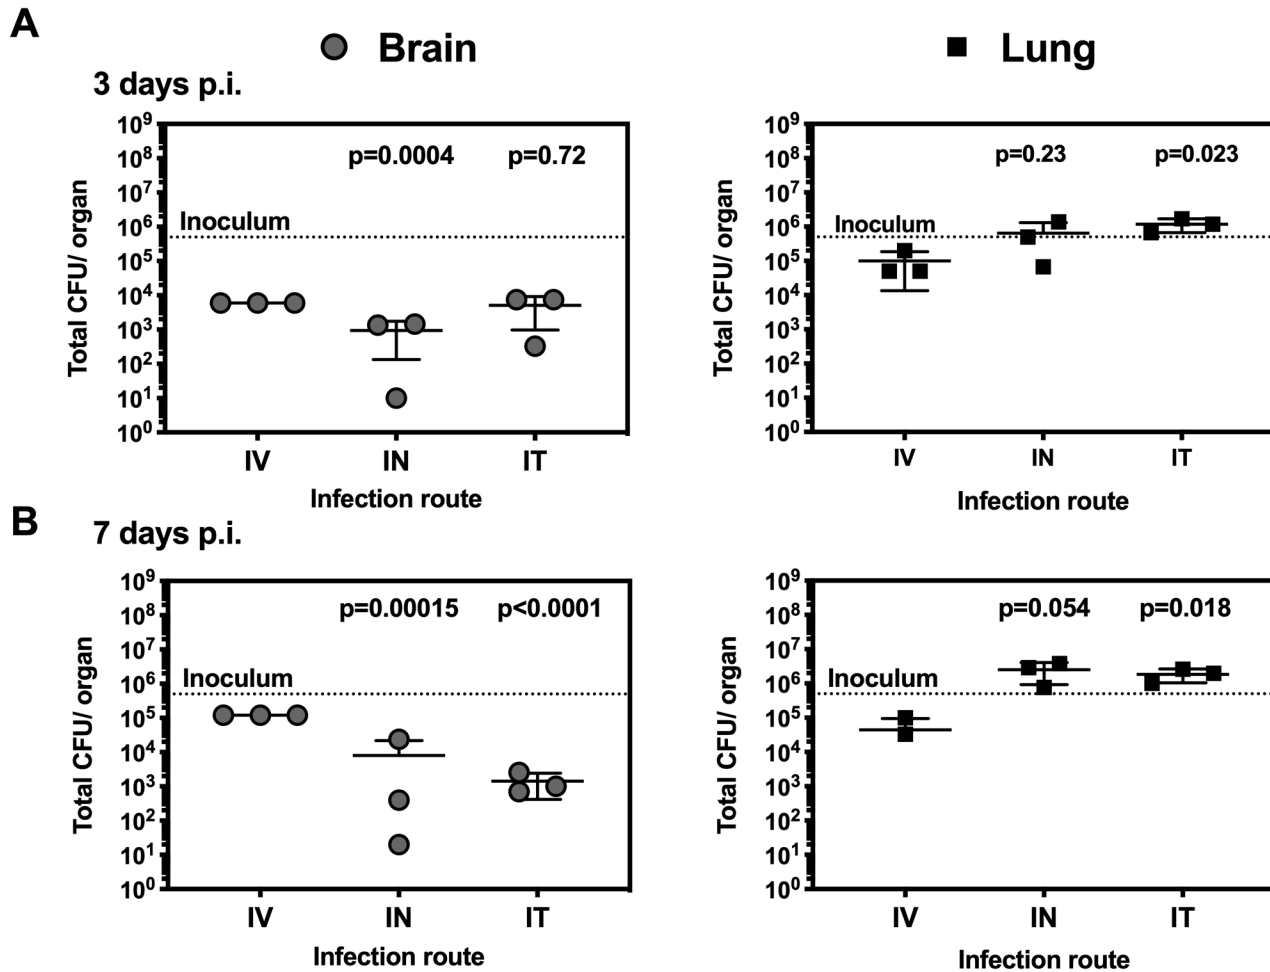

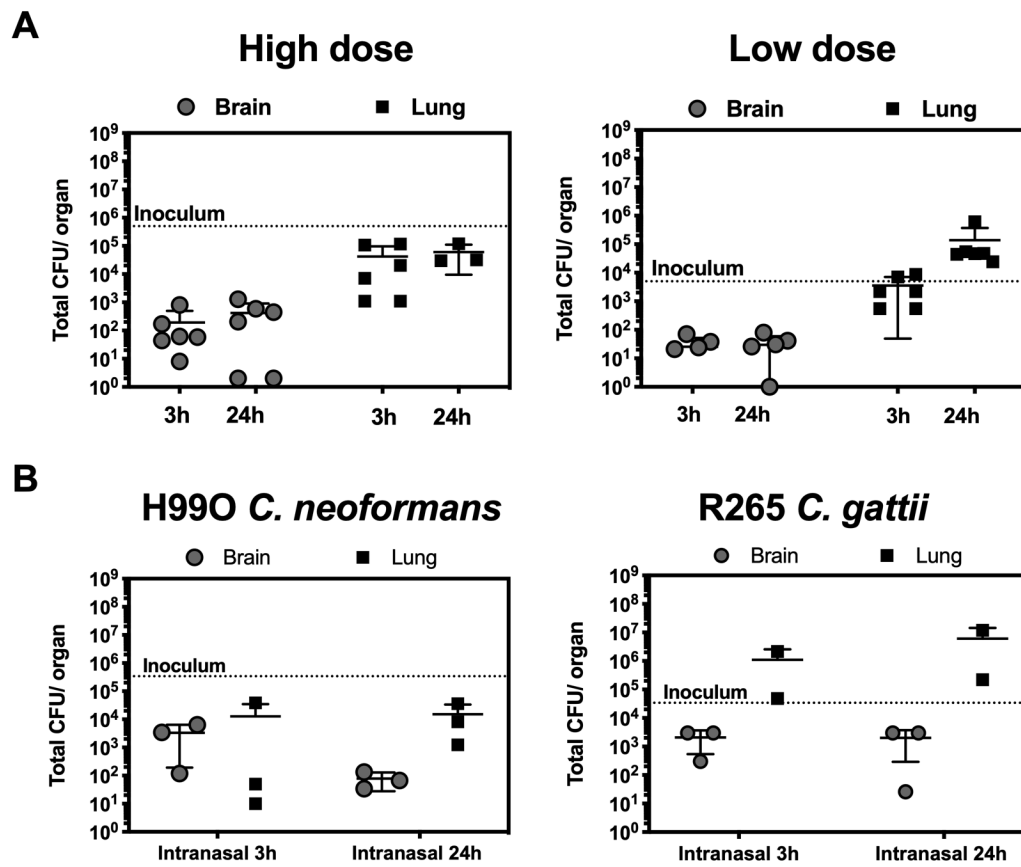



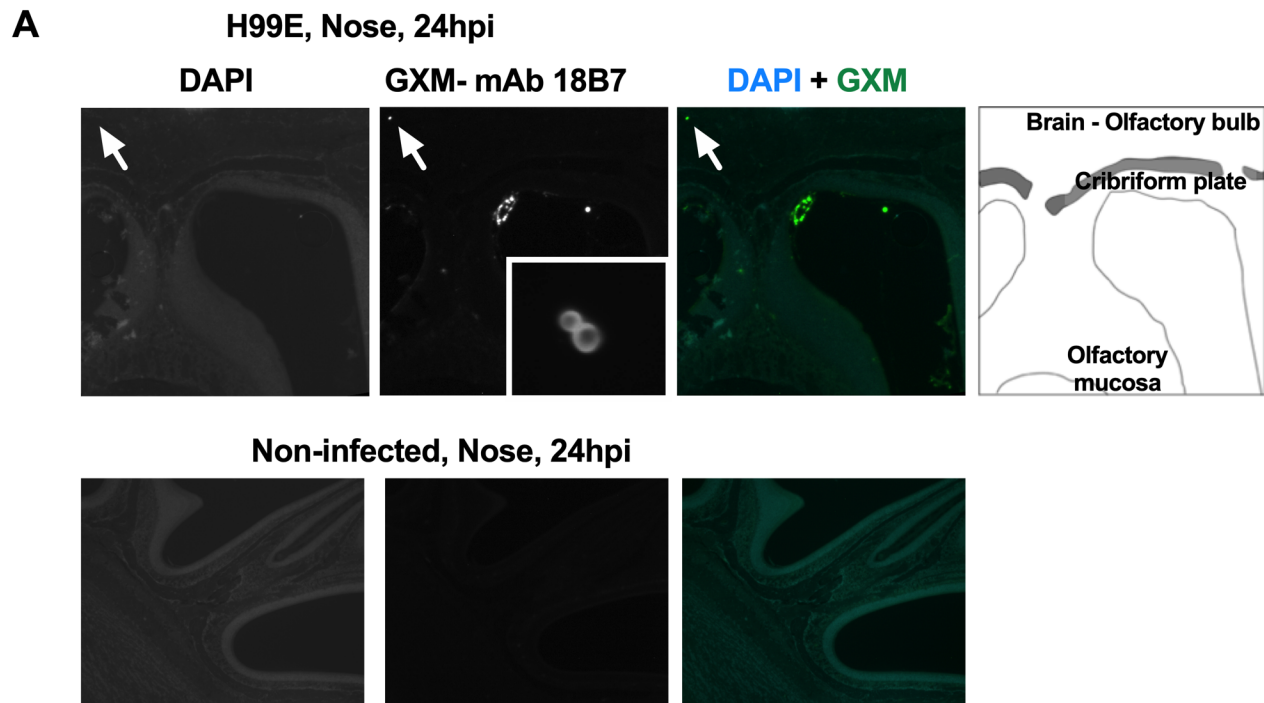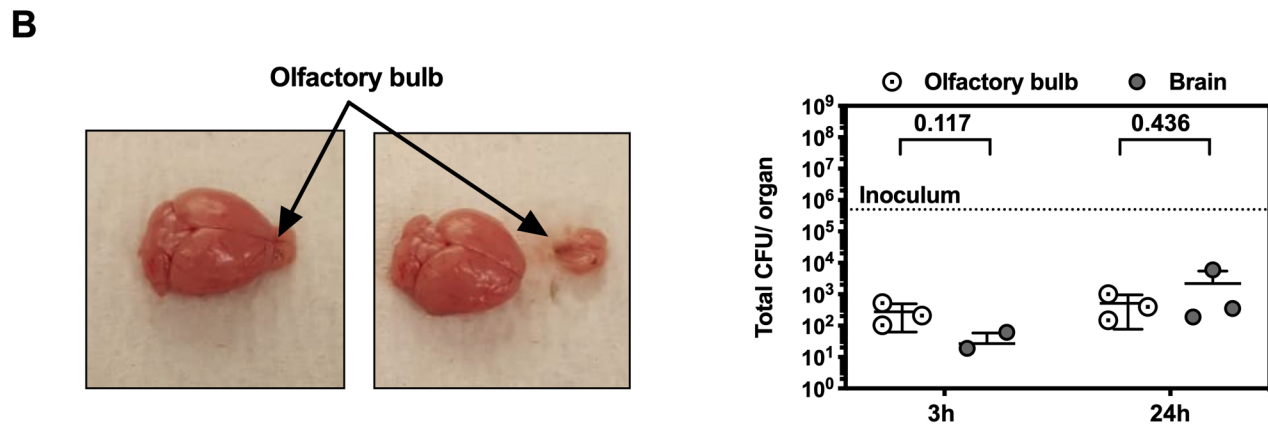

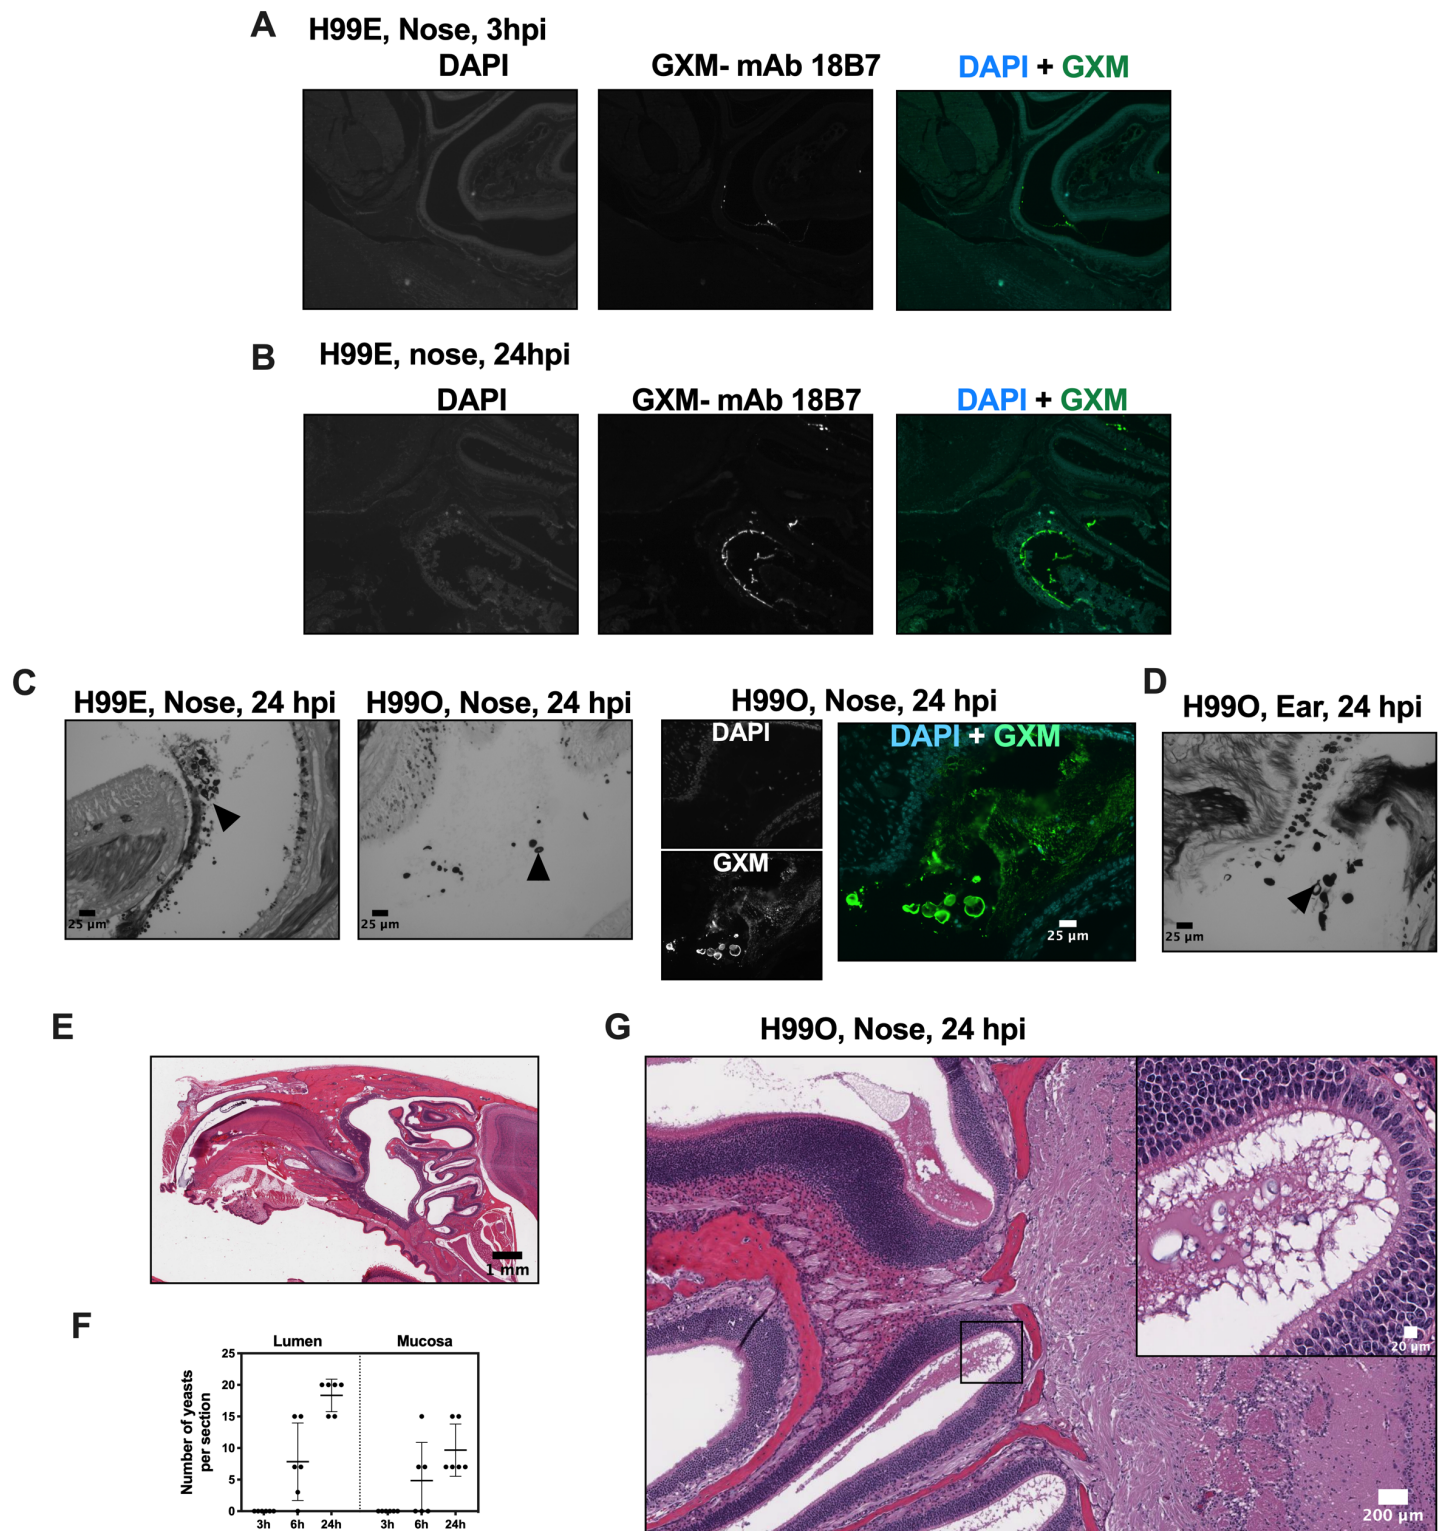

Source: https://www.biorxiv.org/content/10.1101/709204v1.full.pdf
